# Supplementary material
Source: PubMed Central journal article supplement (PMC10387471)

Figure S1

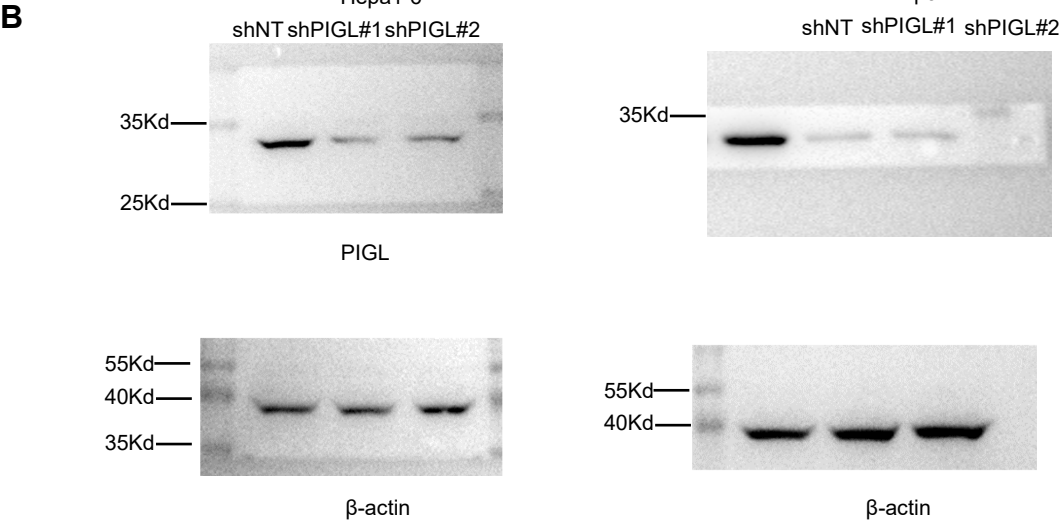

Figure S2

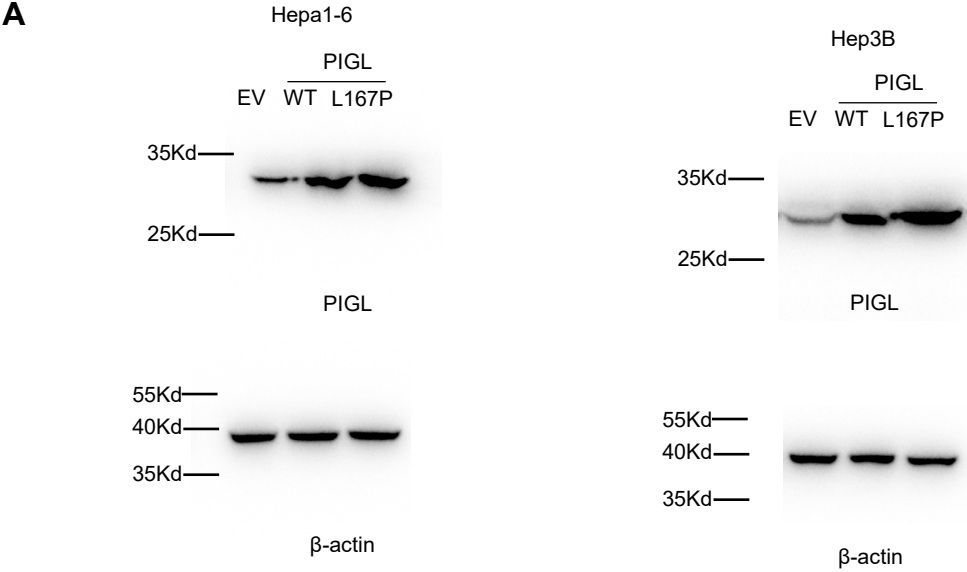

Figure 5

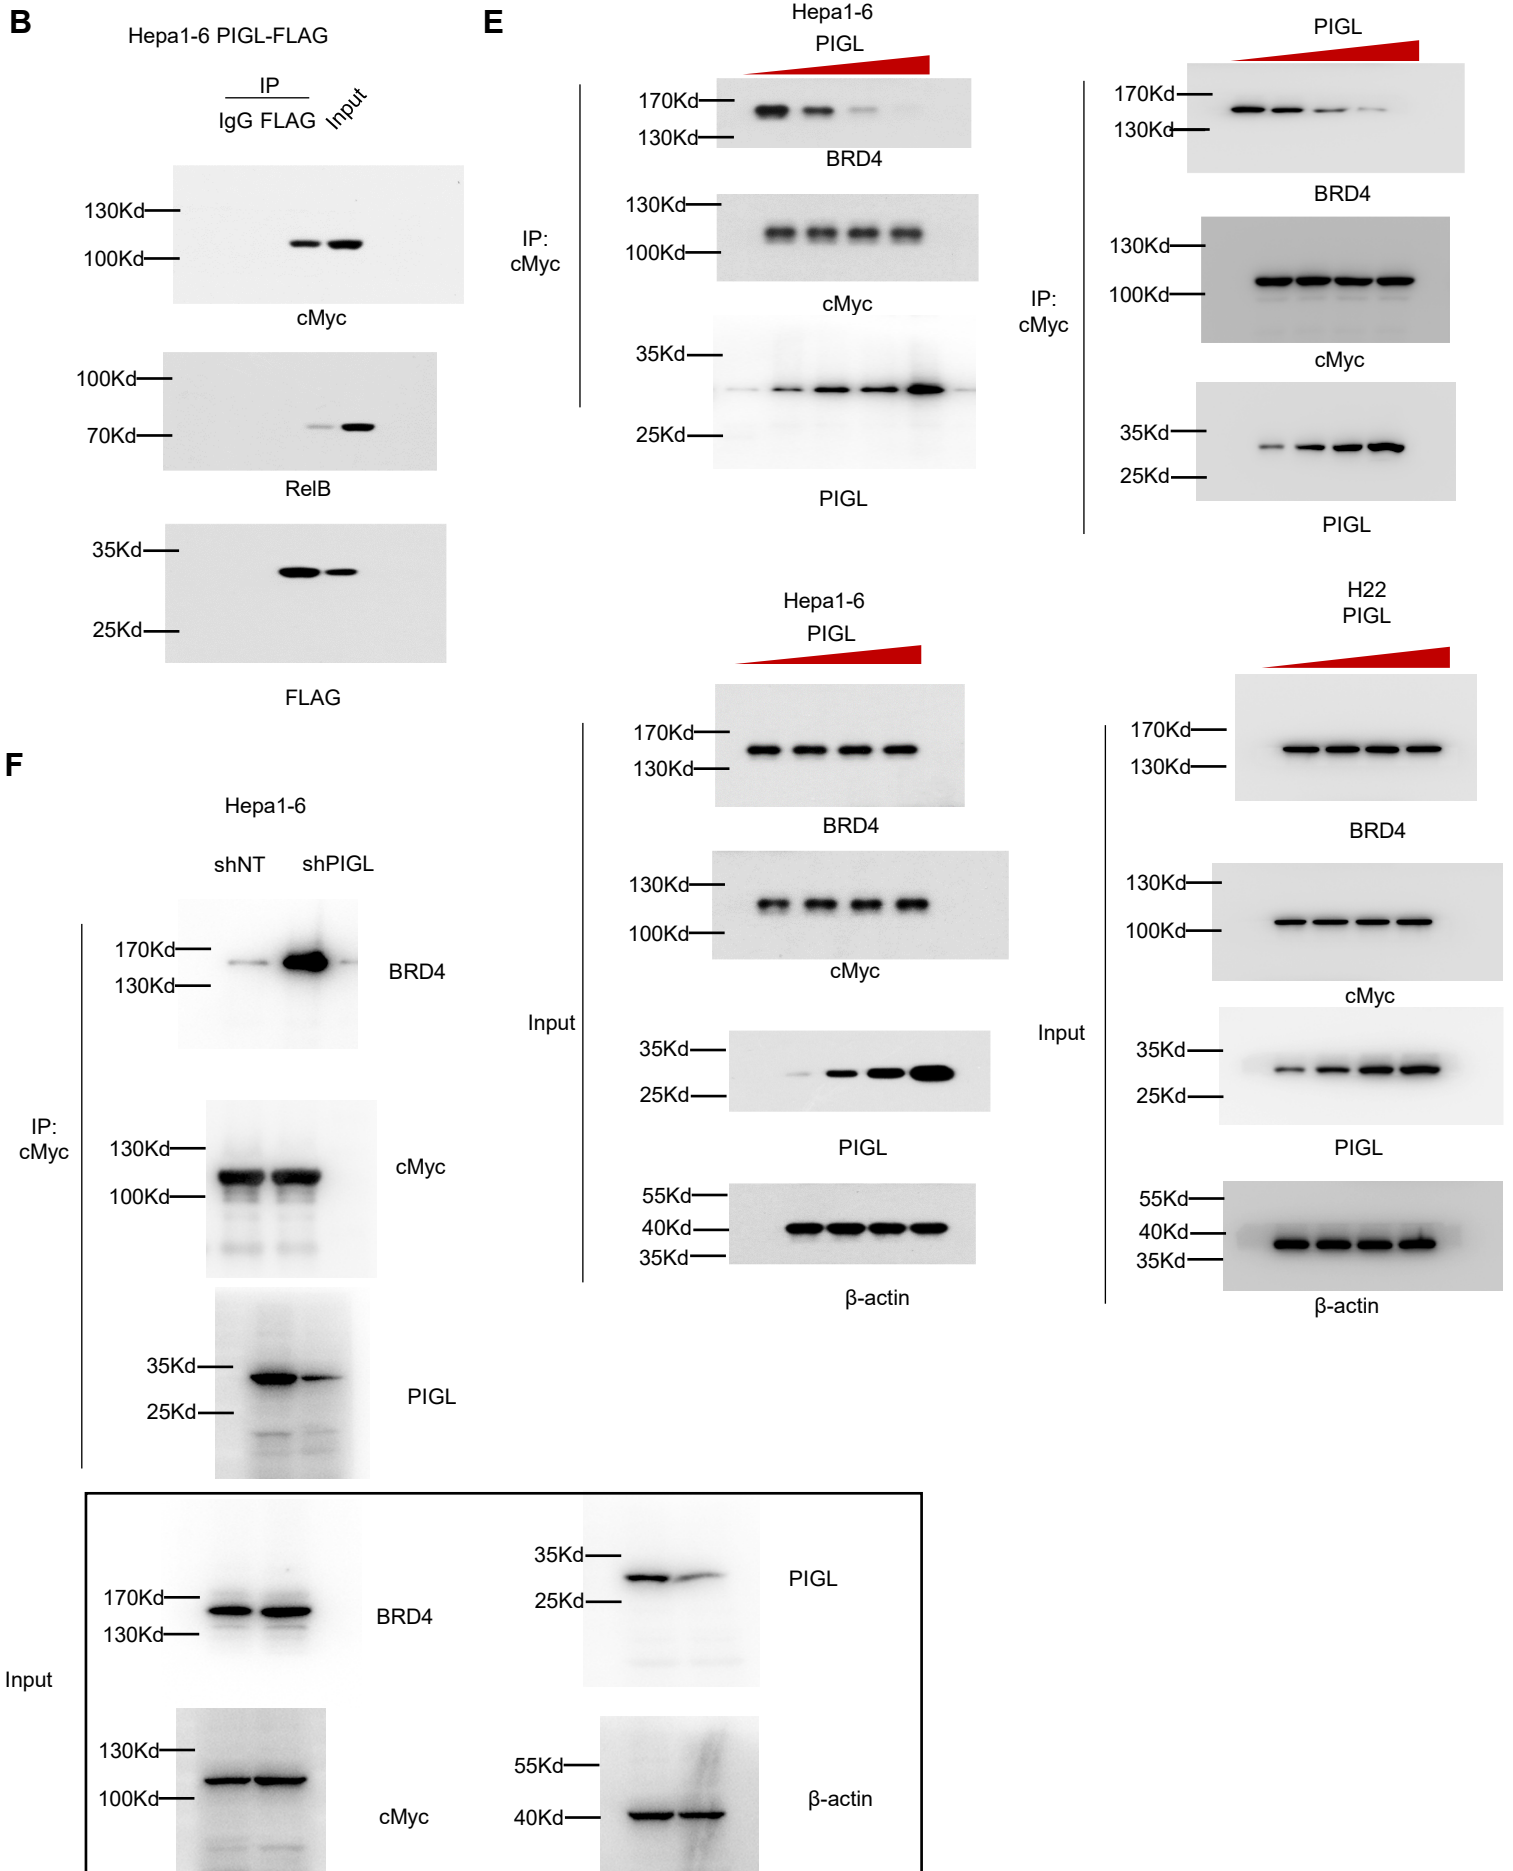

Figure 5

**G**

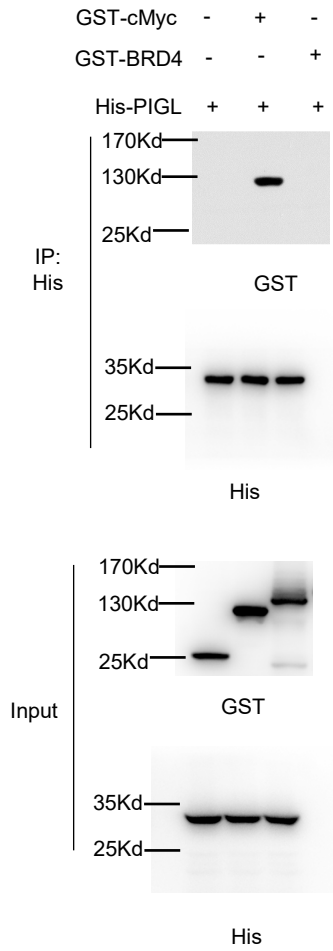

**H**

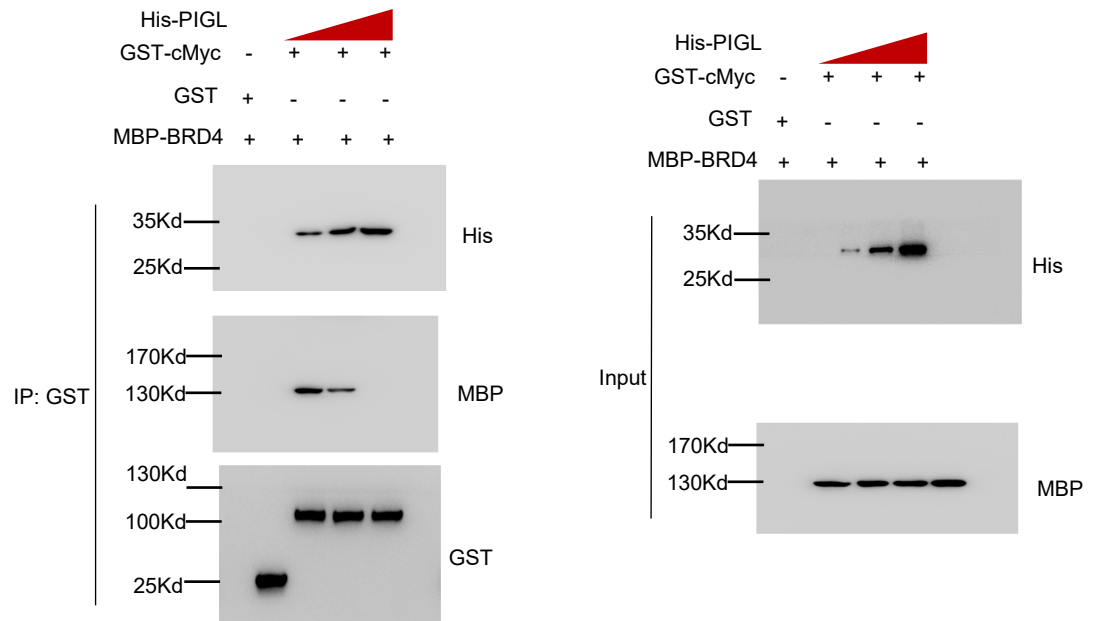

**I**

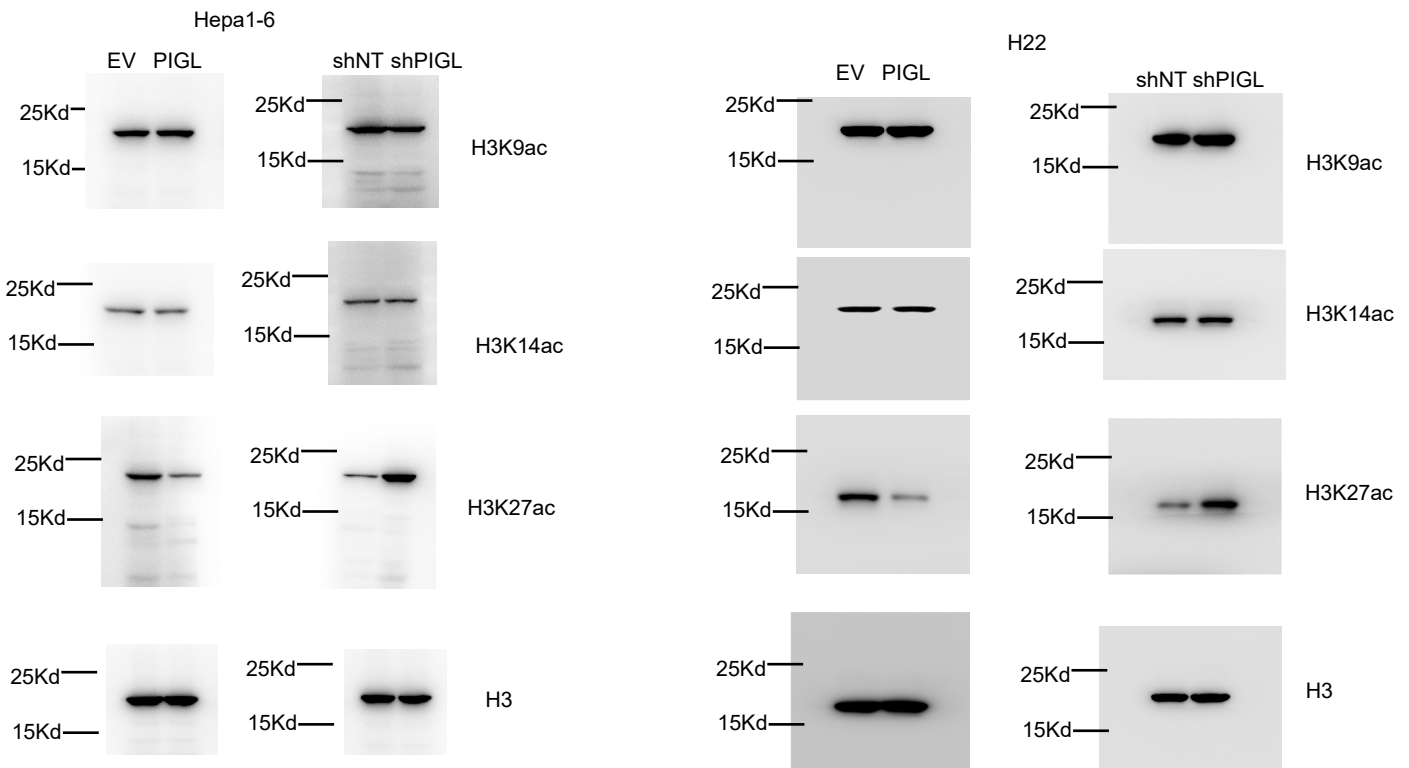

**Figure 6**

**C**

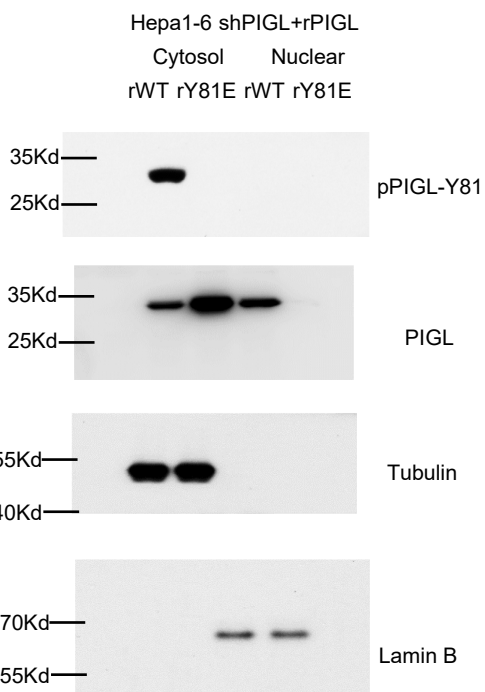

**E**

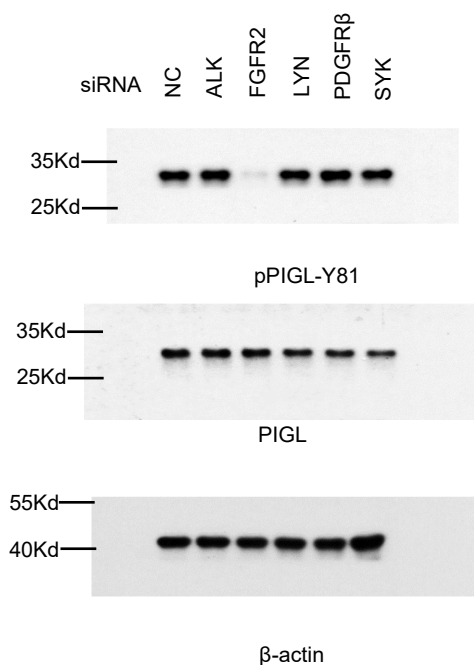

**F**

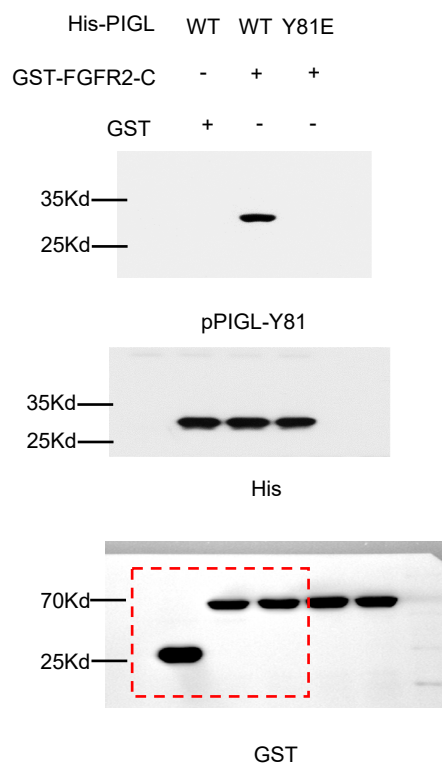

**H**

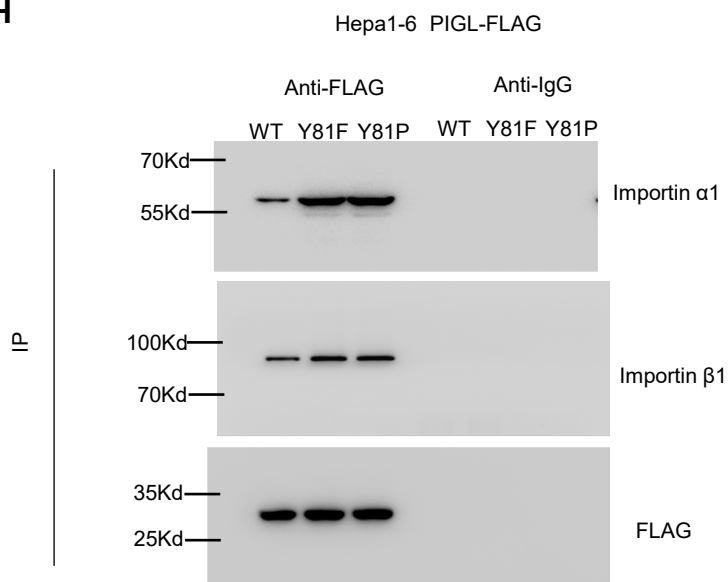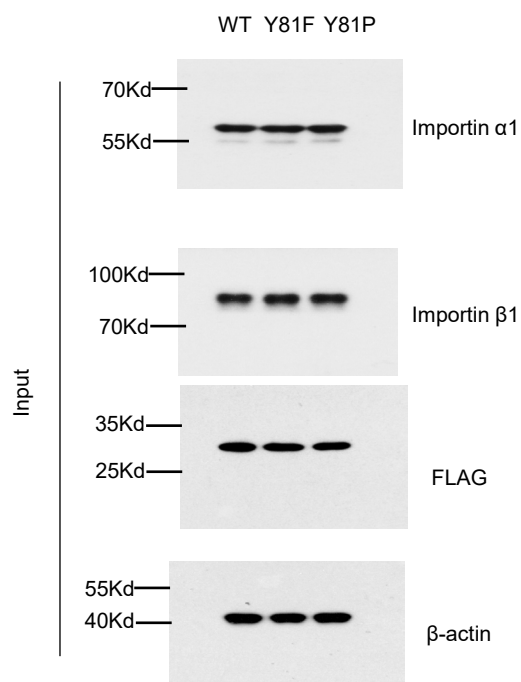

# Figure 6

Hepa1-6 shPIGL+rPIGL

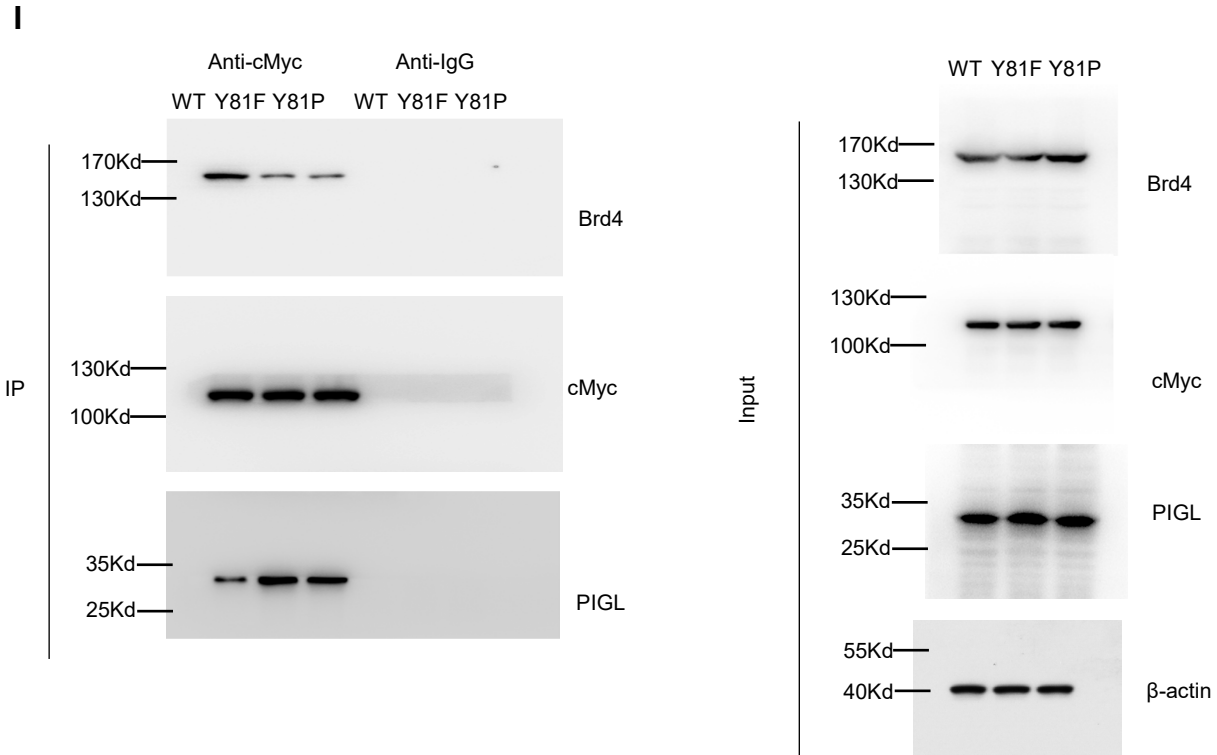

# Figure S6

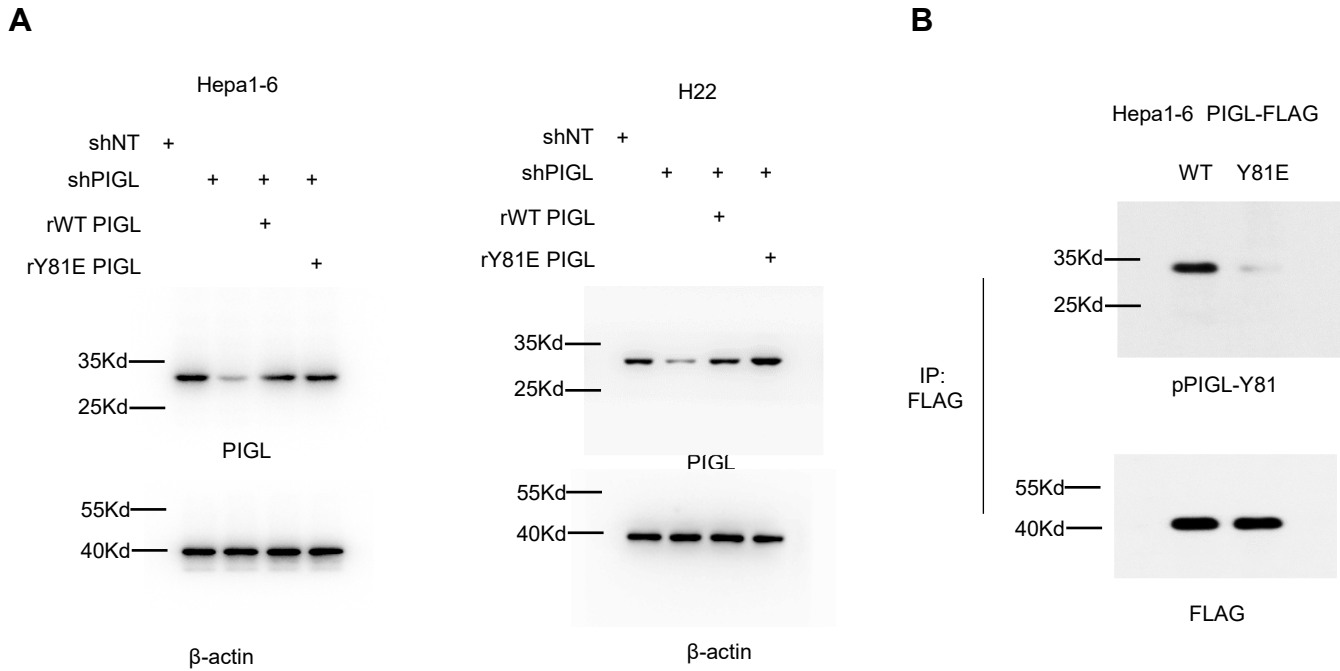

Figure S6

D

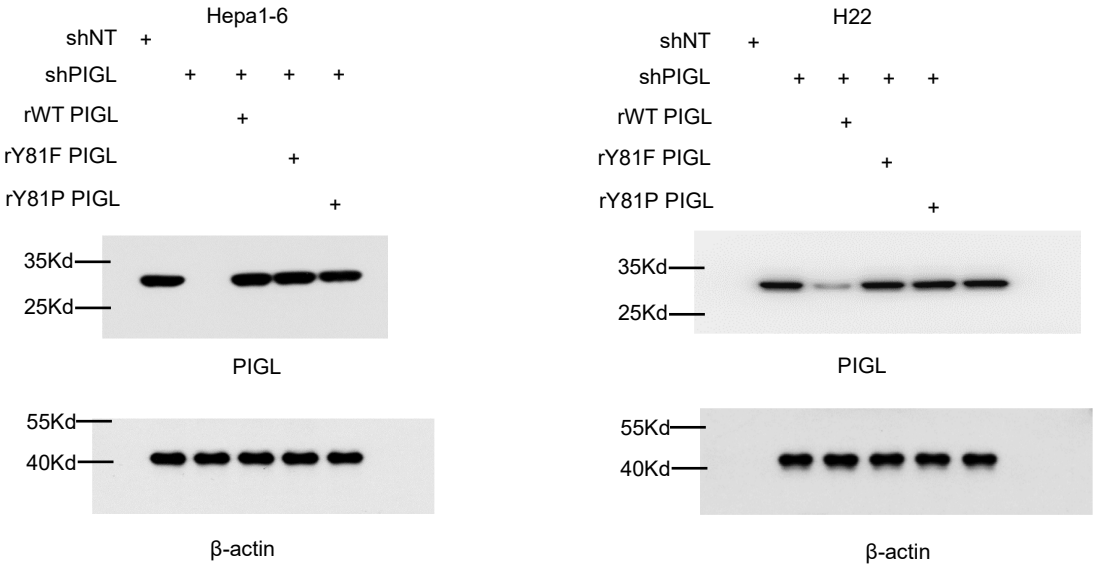

E

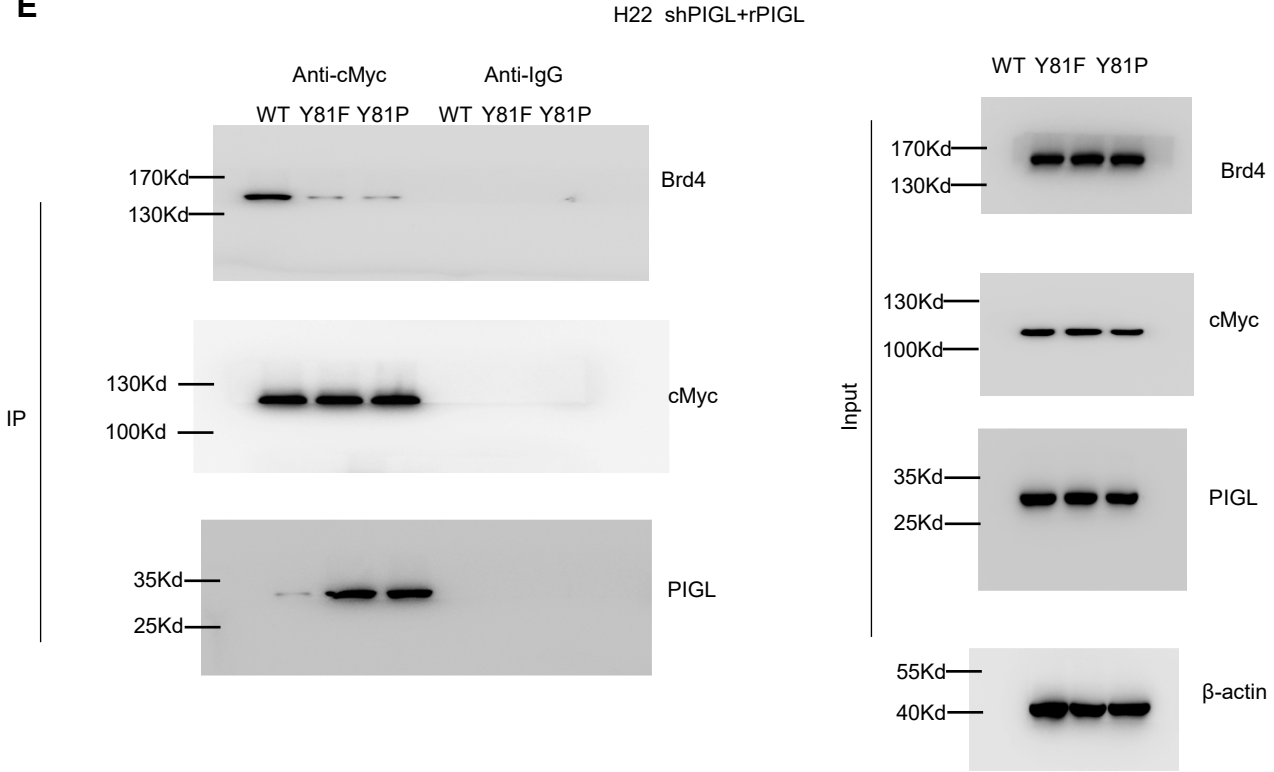

Supplement: 41423_2023_1048_MOESM2_ESM.pdf [file 41423_2023_1048_MOESM2_ESM.pdf]
